# Supplementary material for: Tumor suppressor miR-24 restrains gastric cancer progression by downregulating RegIV
Source: PubMed Central journal article supplement (PMC4041902; doi:10.1186/1476-4598-13-127), 2014-05-28

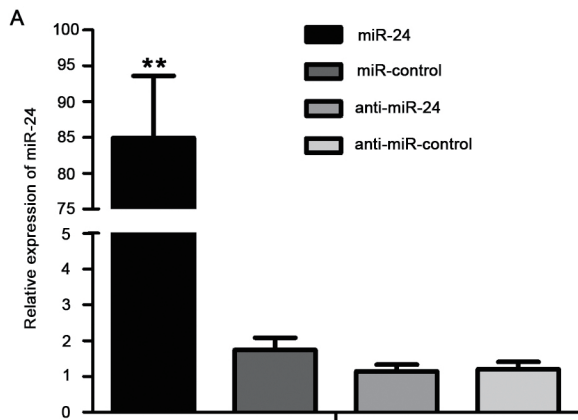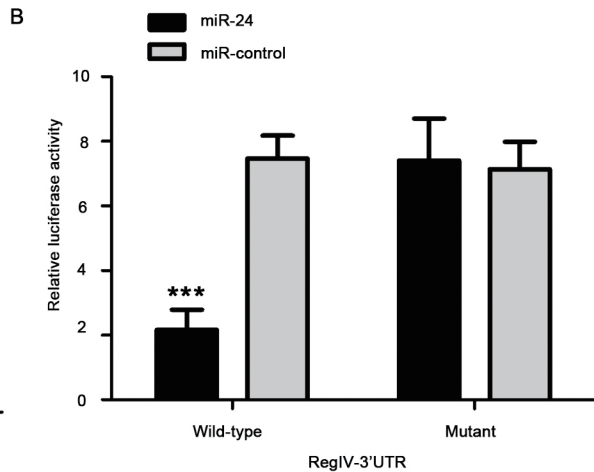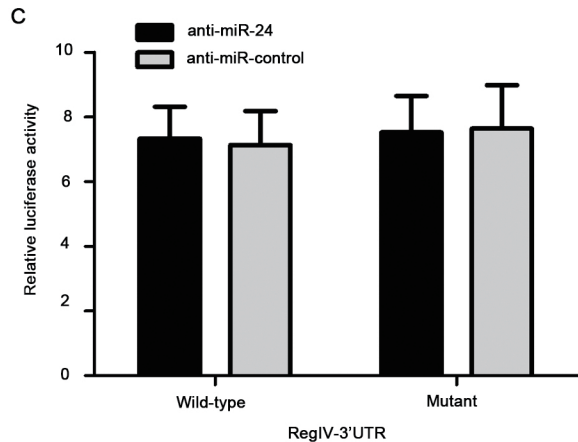

Supplement: 1476-4598-13-127-S3.pdf [file 1476-4598-13-127-S3.pdf]
